# Supplementary material for: miR-150 inhibits terminal erythroid proliferation and differentiation
Source: PubMed Central journal article supplement (PMC4767489; doi:10.18632/oncotarget.5824), 2015-11-03
Supplement: oncotarget-06-43033-s001.pdf [file oncotarget-06-43033-s001.pdf]

SUPPLEMENTARY FIGURES AND TABLE

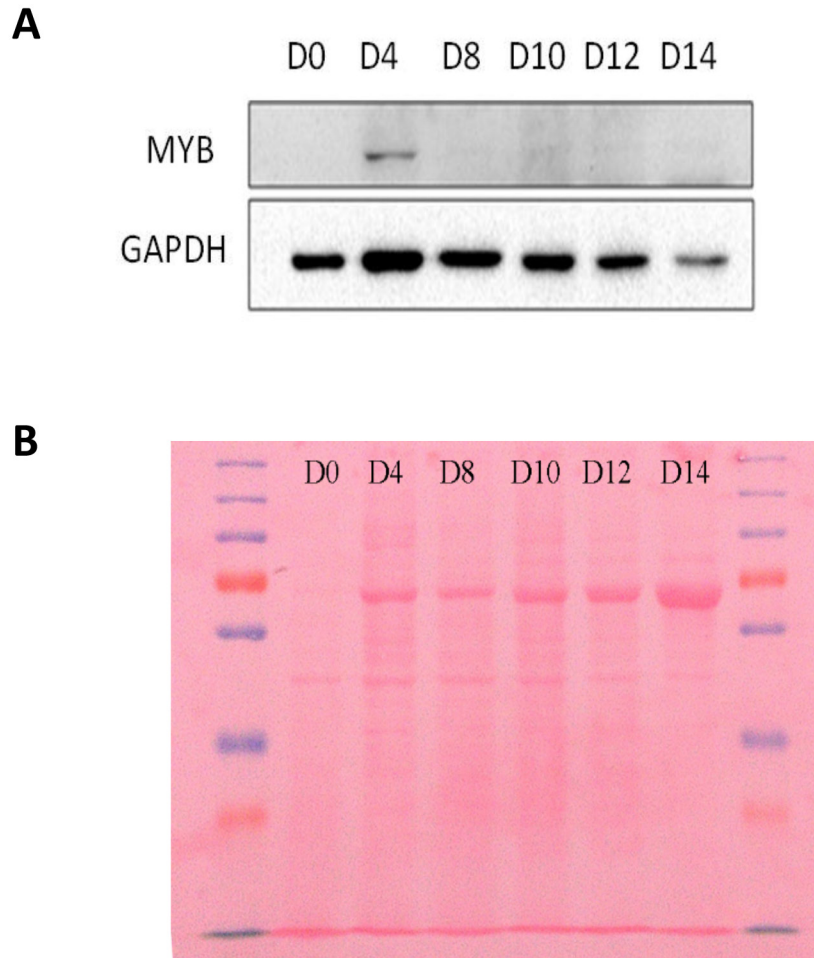

**Supplementary Figure S1: Changes of MYB protein level during EPO-induced CD34<sup>+</sup> cells.** **A.** Western blot analysis of MYB on culture days 0, 4, 8, 10, 12 and 14. **B.** The same membrane from the above assay stained by Ponceau S.

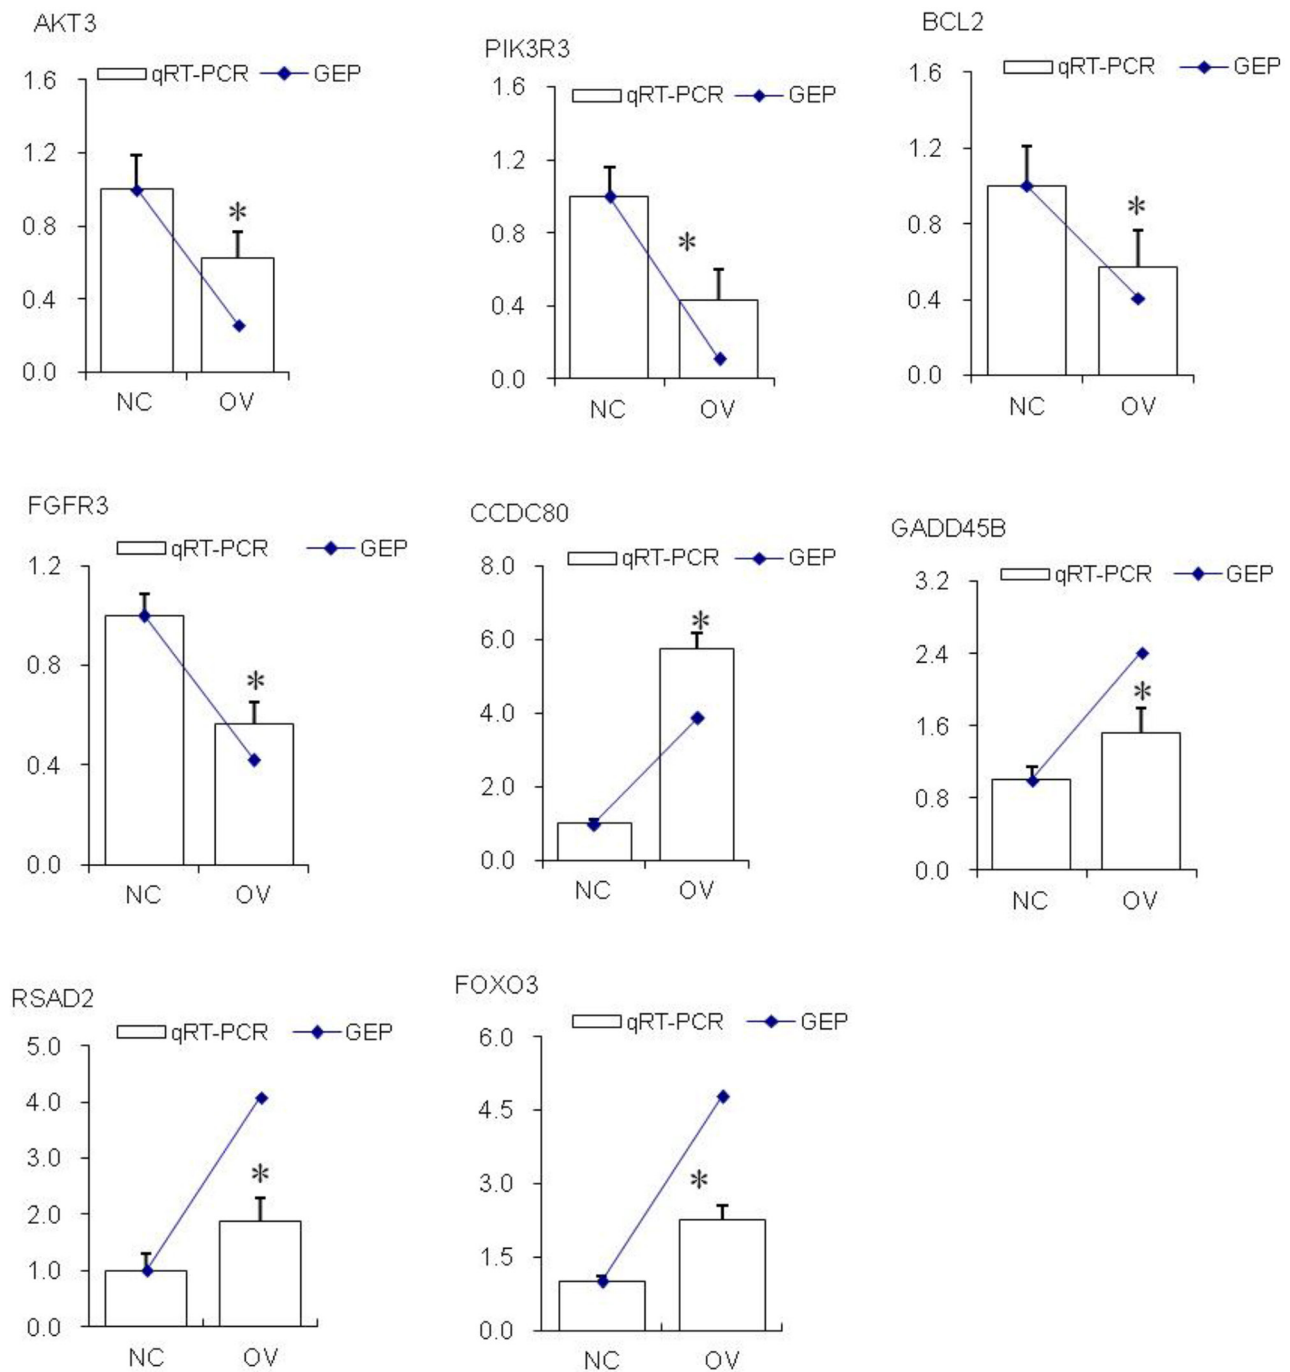

**Supplementary Figure S2: qRT-PCR verification of genes expression profiling (GEP) in erythroid cells derived from hemin-induced K562 cells with (OV) or without (NC) miR-150 overexpression.** All data were normalized to the NC treatment. Values shown are the mean  $\pm$  SEM ( $n = 3$ ). \* $P < 0.05$  compared with the negative control.

**Supplementary Table S1: Human specific primers of qRT-PCR for verifying transcriptional profiling**

| Gene   | Forward primer (5' -> 3') | Reverse primer (5' -> 3') |
|--------|---------------------------|---------------------------|
| RSAD2  | CGTGAGCATCGTGAGCAATG      | TCCCTACACCACCTCCTCAG      |
| CCDC80 | CAATTTTGGTCTGCGCCACA      | ATGGAGAAGTACTCCGGGCT      |
| PIK3R3 | AAAGTCGAGATGGAGAGCAGC     | AGTCATTGGCTTAGGTGGCT      |
| FOXO3  | TGTTGGTTTGAACGTGGGGA      | TGTCCACTTGCTGAGAGCAG      |
| AKT3   | GAGGGGAGTCATCATGAGCG      | ACTGGCATTGTTGCCACTGAA     |
| FGFR3  | GGAGTTCCACTGCAAGGTGT      | TCCTTGTCGGTGGTGTAGC       |
| BCL2   | GAACTGGGGGAGGATTGTGG      | CCGTACAGTTCCACAAAGGC      |
| GADD45 | CGTTGGTTTCCGCAACTTCC      | AAAATCCGAGCCAGAGAGCC      |
